# Supplementary material for: One-pot mechanochemical synthesis to encapsulate functional guests into a metal–organic framework for proton conduction
Source: Royal Society of Chemistry journal article supplement (doi:10.1039/d1cc03482k), 2021-01-01
Supplement: d1cc03482k1.pdf [file d1cc03482k1.pdf]

Supporting Information for

**One-pot mechanochemical synthesis to encapsulate functional  
guests into a metal-organic framework for proton conduction**

Yang Wang, Ying Lu,\* Zhuo Li, Xiu-Wei Sun, Wan-Yu Zhang, Shan Zhang, Jie Wang, Tian-Yi Dang, Zhong

Zhang and Shu-Xia Liu\*

Key Laboratory of Polyoxometalate and Reticular Material Chemistry of the Ministry of Education,

College of Chemistry, Northeast Normal University,

Changchun, Jilin 130024, China

\*e-mail: liusx@nenu.edu.cn; luy968@nenu.edu.cn

## Contents

### Section S1 Experimental Section

1. Materials
2. Instruments
3. Synthesis of NENU-3 and Guest@NENU-3
4. Proton Conductivities Studies

### Section S2 Additional Structural Figures and Characterizations

- Fig. S1** The pore structure of NENU-3
- Fig. S2** SEM images of NENU-3 and Im@NENU-3 and the elemental mappings of Im@NENU-3
- Fig. S3** Nitrogen 1s photoelectron spectroscopy for Im@NENU-3
- Fig. S4** Nyquist plot of NENU-3 at 95% RH and 338K
- Fig. S5** Humidity dependence of proton conductivity at 338K for Im@NENU-3
- Fig. S6** Time-dependent proton conductivity of Im@NENU-3 at 338K and 95%RH
- Fig. S7** PXRD patterns of post-impedance for Im@NENU-3
- Fig. S8** PXRD patterns of APA@NENU-3, Urea@NENU-3 and SA@NENU-3
- Fig. S9** SEM images of APA@NENU-3, Urea@NENU-3 and SA@NENU-3
- Fig.S10-12** SEM image and corresponding elemental mappings of APA@NENU-3, Urea@NENU-3 and SA@NENU-3
- Fig. S13** FT-IR spectra of APA@NENU-3, Urea@NENU-3 and SA@NENU-3
- Fig. S14** TG plots of APA@NENU-3, Urea@NENU-3 and SA@NENU-3
- Fig. S15** N<sub>2</sub> adsorption isotherms of APA@NENU-3, Urea@NENU-3 and SA@NENU-3
- Fig. S16-18** Nyquist plots of APA@NENU-3, Urea@NENU-3 and SA@NENU-3at different temperatures and 95% RH
- Fig. S19** FT-IR spectra and PXRD pattern of Im@HKUST-1
- Fig. S20** Time-dependent proton conductivity of APA@NENU-3, Urea@NENU-3 and SA@NENU-3 at 338K and 95%RH
- Fig. S21** PXRD patterns of post-impedance for APA@NENU-3, Urea@NENU-3 and SA@NENU-3

### Section S3 Additional Tables

- Table S1** Comparison of proton conductivity of Im@NENU-3 with some other representative proton conductors measured under hydrous condition

## Section S1 Experimental Section

### 1. Materials:

All the chemicals and reagents including cupric nitrate hydrate, trimesic acid, phosphotungstic acid, imidazole, urea, sulfamic acid and (Aminomethyl) phosphonic acid, sodium hydroxide, ethanol were obtained from commercial sources and used without further purification.

### 2. Instruments:

Elemental analyses (CHN) were conducted on a PerkinElmer 2400 CHN Elemental analyzer. Infrared (IR) spectroscopy was performed in the range of 4000-400  $\text{cm}^{-1}$  using the KBr pellet on an Alpha Centaur FT/IR spectrophotometer. The room temperature powder X-ray diffraction (PXRD) spectra in the range of  $2\theta = 5-50^\circ$  were performed on a Siemens D5005 diffractometer with Cu-K $\alpha$  radiation. X-ray photoelectron spectra (XPS) were collected on Thermo ESCALAB 250 X-ray photoelectron spectrometer. Thermal gravimetric analysis (TGA) was carried out using a Perkin-Elmer TG-7 analyzer in flowing  $\text{N}_2$  heated from room temperature to 600  $^\circ\text{C}$  with a heating rate of 10  $^\circ\text{C}/\text{min}$ . The water adsorption and desorption isotherms of the complex 1' were carried out by ASAP 2020 instrument at 25  $^\circ\text{C}$ . The alternating current (AC) impedance spectroscopy data were obtained using a Solartron SI 1260 Impedance/Gain-Phase Analyzer over the frequency range of 10-10<sup>7</sup> Hz and an applied voltage of 200 mV.

### 3. Synthesis

#### Im@NENU-3:

$\text{Cu}(\text{NO}_3)_2 \cdot 3 \text{H}_2\text{O}$  (0.24 g, 1 mmol) and  $\text{H}_3\text{PW}_{12}\text{O}_{40} \cdot n \text{H}_2\text{O}$  (0.28 g, 0.092 mmol) were milled for 3 min in an agate mortar. Then  $\text{H}_3\text{BTC}$  (0.14 g, 0.67 mmol), imidazole (0.1 g, 0.15 mmol) and ethanol (0.7mL) were added to the mortar at ambient temperature and ground for 8 minutes to obtain blue solid material. The yielded product was washed several times with deionized water and ethanol, respectively. After drying in an oven at 60  $^\circ\text{C}$  for 24 h, the blue Im@NENU-3 was obtained in 95 % yield (calculated on the basis of Cu). Elemental and ICP analyses: C 16.97, H 1.92, N 2.58, P 0.49, Cu 12.16, W 34.87 %.

#### APA@NENU-3, Urea@NENU-3 and SA@NENU-3:

The synthesis method is similar to Im@NENU-3. Just replace imidazole with (Aminomethyl) phosphonic acid, urea, and sulfamic acid, respectively. Elemental and ICP analyses: APA@NENU-3 (C 14.64, H 1.62, N 1.64, P 4.07, Cu 11.78, W 33.72 %); Urea@NENU-3 (C 15.49, H 1.53, N 2.44, P 0.53, Cu 12.84, W 36.81 %); SA@NENU-3 (C 14.39, H 1.58, N 0.68, P 0.51, Cu 12.79, W 36.67 %).

#### NENU-3:

$\text{Cu}(\text{NO}_3)_2 \cdot 3 \text{H}_2\text{O}$  (0.24 g, 1 mmol) and  $\text{H}_3\text{PW}_{12}\text{O}_{40} \cdot n \text{H}_2\text{O}$  (0.28 g, 0.092 mmol) were milled for 3 min in an agate mortar. Then  $\text{H}_3\text{BTC}$  (0.14 g, 0.67 mmol) and ethanol (0.7mL) were added to the mortar at ambient temperature and ground for 5 minutes to obtain blue solid material. The yielded product was washed several times with deionized water and ethanol, respectively. Elemental and ICP analyses: C 12.68, H 1.85, P 0.51, Cu 12.68, W 36.40 %.

#### 4. Proton Conductivities Studies

The compacted tablet used for conductivity measurements has a diameter of 0.8 cm and a thickness in the range of 0.05-0.06 cm, which was obtained by pressing crystal powders at 6 Mpa for 1 min. The tablet was sandwiched by two copper-plated electrodes. The changing temperature (298K-338K) and relative humidity environments (55 to 95% RH) were controlled by the Memmert HCP108 constant temperature humidity chamber. During the variable temperature/ RH conductivity measurement, samples were equilibrated for at least 2 hours after each step in temperature or 12 hours for each step in RH. The proton conductivities were calculated using the equation:  $\sigma = L / (S \cdot R)$ , where L and S are the thickness (cm) and cross-sectional area (cm<sup>2</sup>) of the tablet, respectively. The  $\sigma$  is the proton conductivity (S cm<sup>-1</sup>). The activation energy was calculated from the following Arrhenius equation:

$$\sigma T = \sigma_0 \exp(-E_a / k_B T)$$

Where  $\sigma$  is the proton conductivity,  $k_B$  is the Boltzmann constant,  $\sigma_0$  is the pre-exponential factor, and T is the temperature.

#### Section S2 Additional Structural Figures and Characterizations

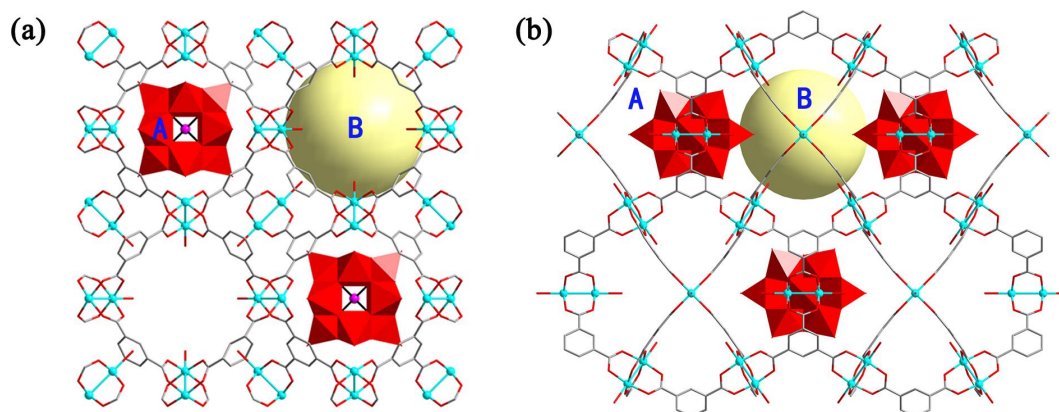

**Fig. S1** The pore structure of NENU-3. (a)  $\langle 100 \rangle$  orientation. (b)  $\langle 110 \rangle$  orientation. P (pink), W (dark teal), Cu (sky blue), C (gray), O (red). All H atoms are omitted for clarity.

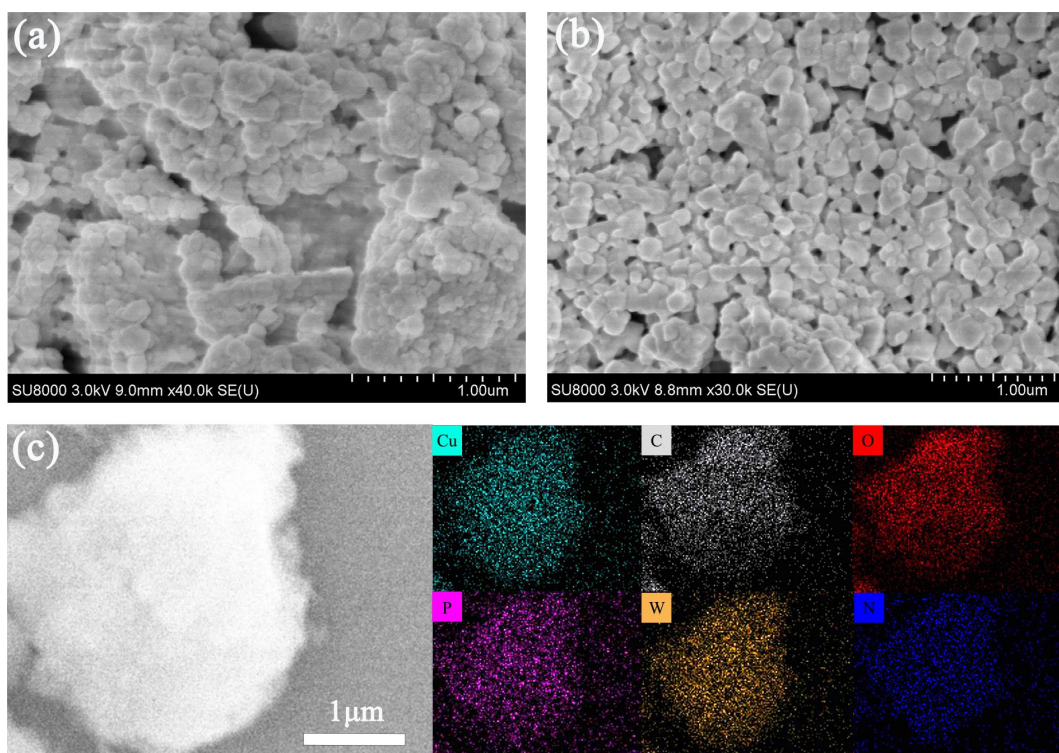

**Fig. S2** SEM images of (a) NENU-3 and (b) Im@NENU-3, (c) SEM image and corresponding elemental mappings of Im@NENU-3.

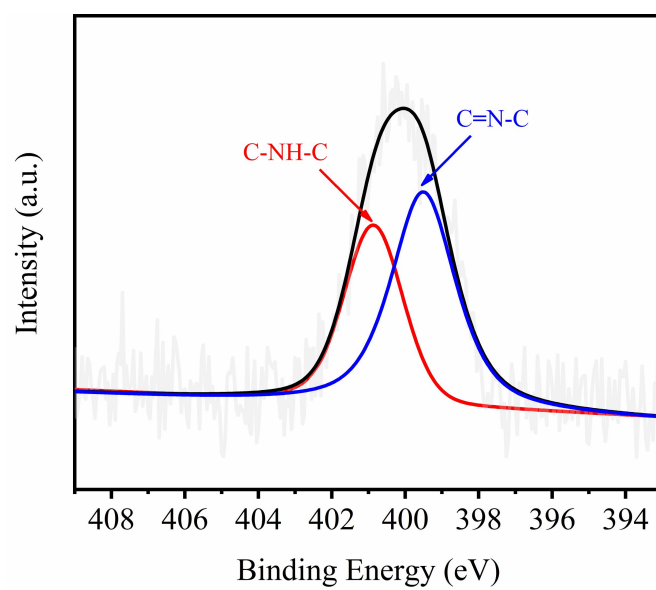

**Fig. S3** Nitrogen 1s photoelectron spectroscopy for Im@NENU-3

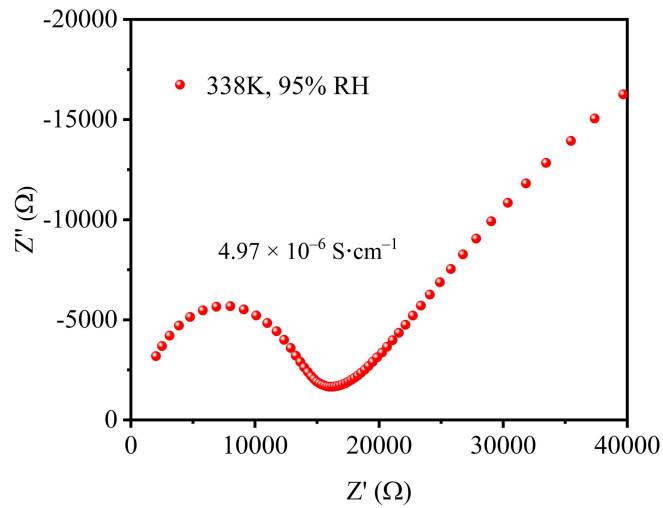

**Fig. S4** Nyquist plot of NENU-3 at 95% RH and 338K.

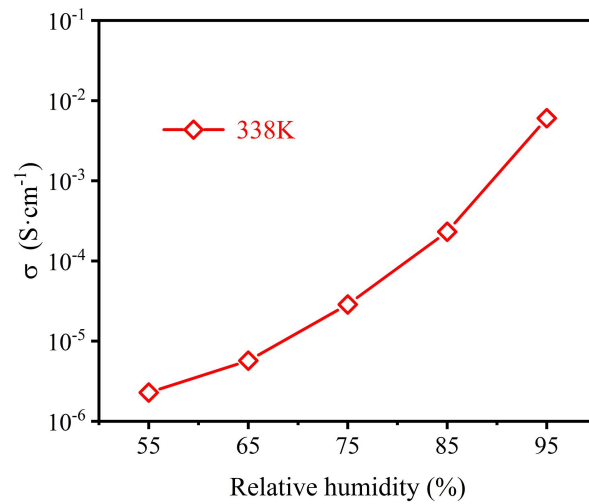

**Fig. S5** Humidity dependence of proton conductivity at 338K for Im@NENU-3.

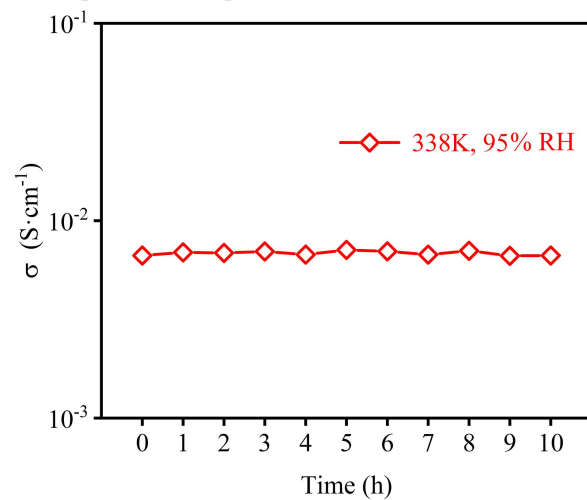

**Fig. S6** Time-dependent proton conductivity of Im@NENU-3 at 338K and 95%RH

The high proton conductivity of Im@NENU-3 at 338K and 95%RH can maintain at least 10 h, so Im@NENU-3 possesses excellent proton-conducting durability.

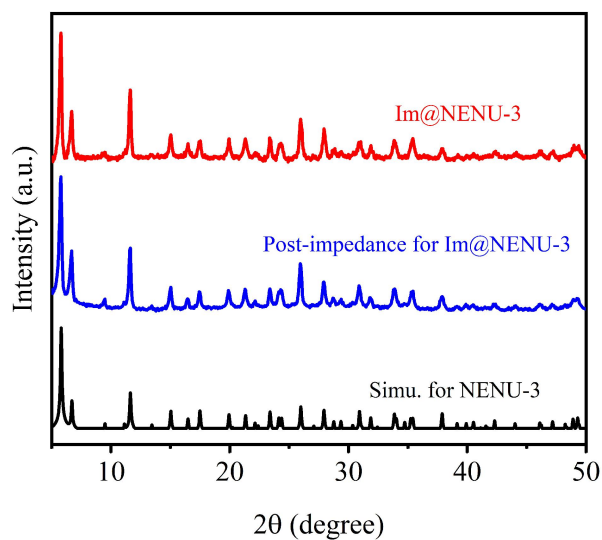

**Fig. S7** PXR D patterns of post-impedance for Im@NENU-3.

The PXR D patterns of Im@NENU-3 samples before and after impedance testing are nearly identical, manifesting that Im@NENU-3 still maintains its structural integrity and crystallinity after AC impedance measurement. Therefore, Im@NENU-3 possesses excellent structural stability.

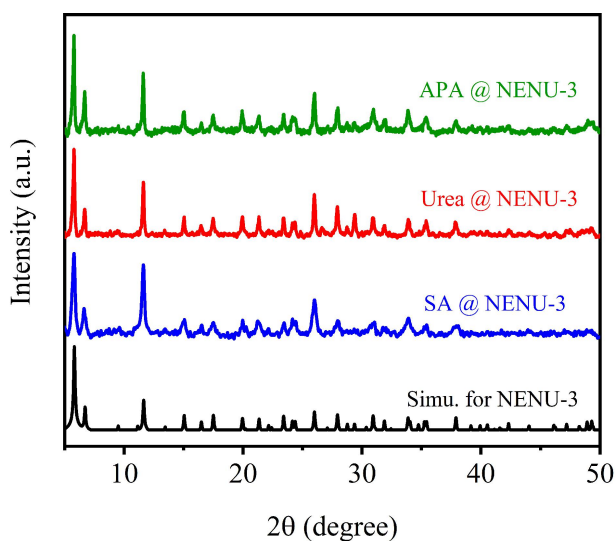

**Fig. S8** PXR D patterns of APA@NENU-3, Urea@NENU-3 and SA@NENU-3.

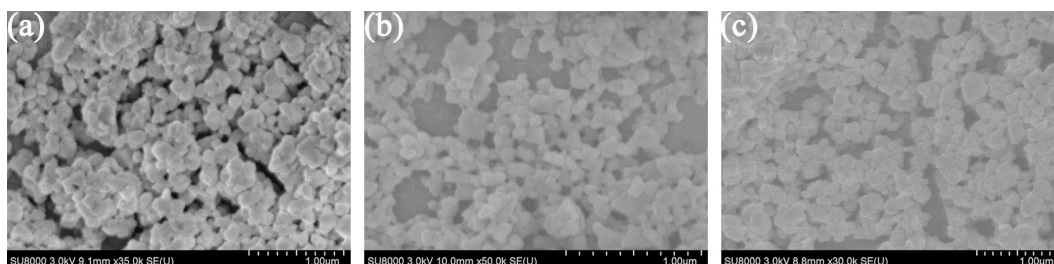

**Fig. S9** SEM images of (a) APA@NENU-3, (b) Urea@NENU-3 and (c) SA@NENU-3.

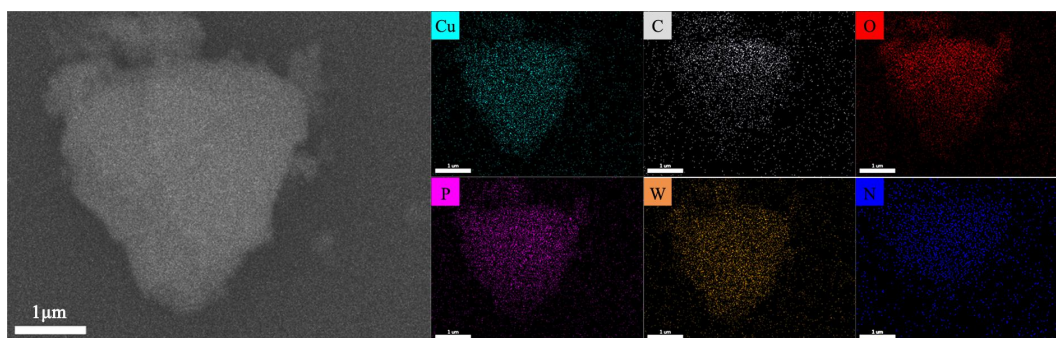

**Fig. S10** SEM image and corresponding elemental mappings of APA@NENU-3

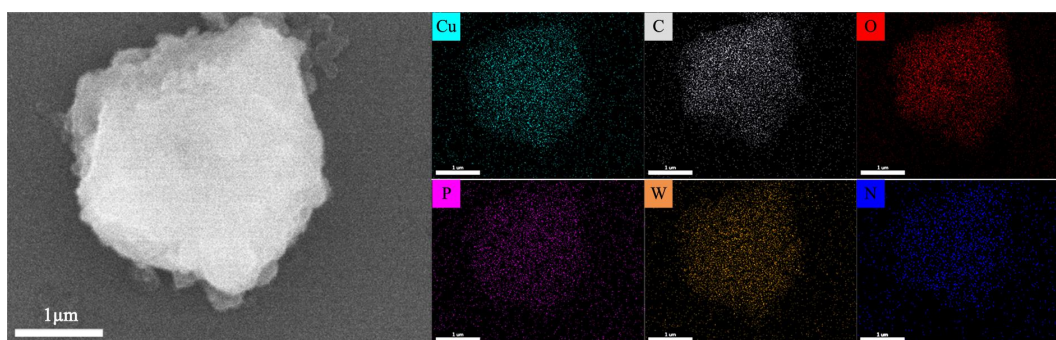

**Fig. S11** SEM image and corresponding elemental mappings of Urea@NENU-3

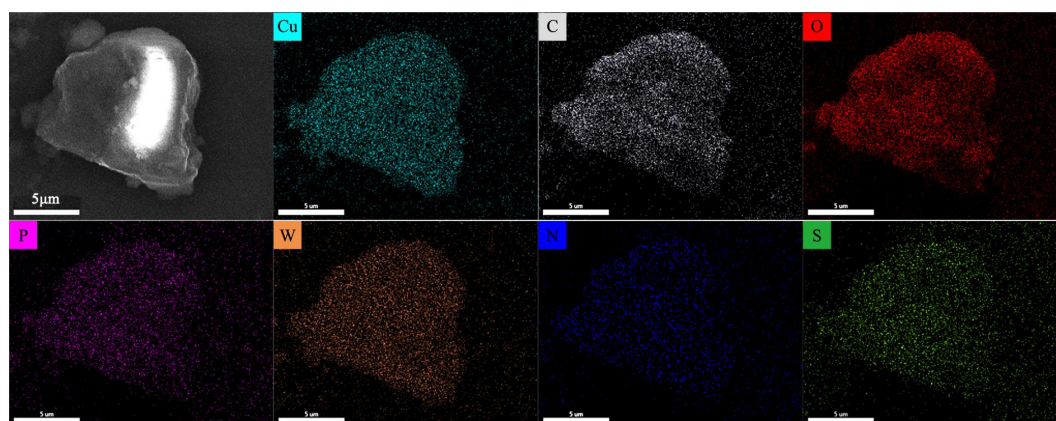

**Fig. S12** SEM image and corresponding elemental mappings of SA@NENU-3

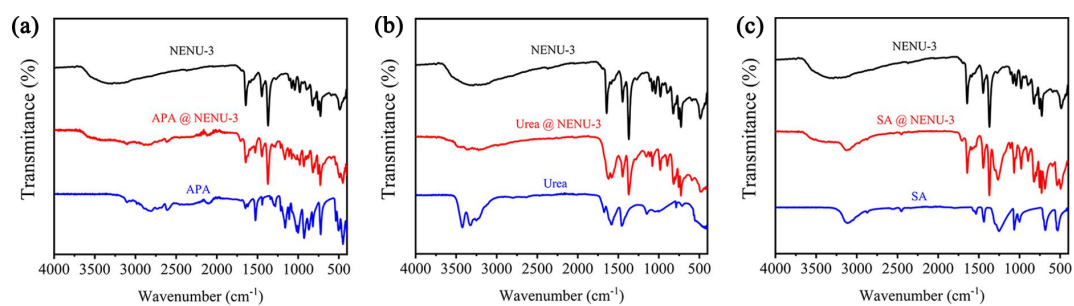

**Fig. S13** FT-IR spectra of (a) APA@NENU-3, (b) Urea@NENU-3 and (c) SA@NENU-3



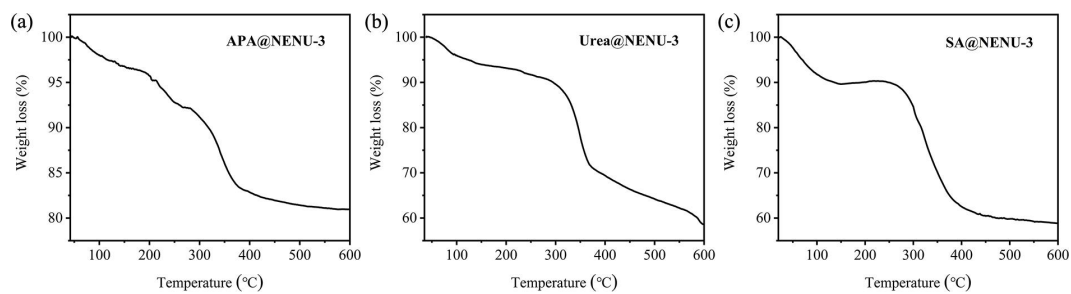

**Fig. S14** TG plots of (a) APA@NENU-3, (b) Urea@NENU-3 and (c) SA@NENU-3.

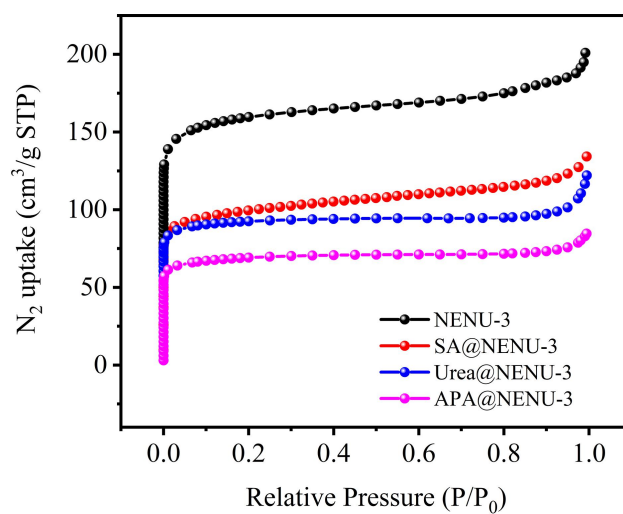

**Fig. S15**  $N_2$  adsorption isotherms of (a) APA@NENU-3, (b) Urea@NENU-3 and (c) SA@NENU-3.

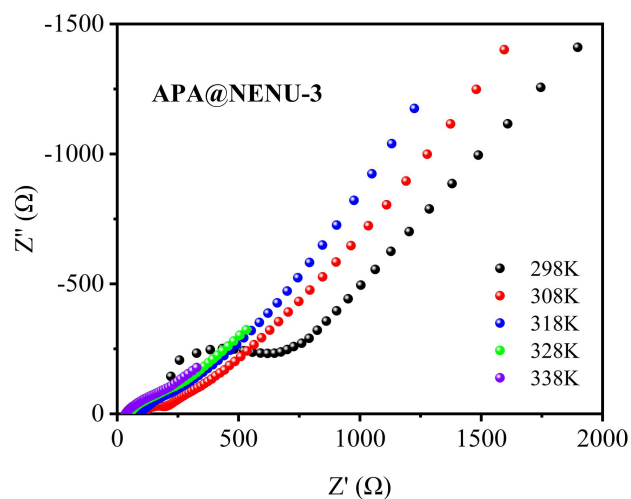

**Fig. S16** Nyquist plots of APA@NENU-3 at different temperatures and 95% RH.

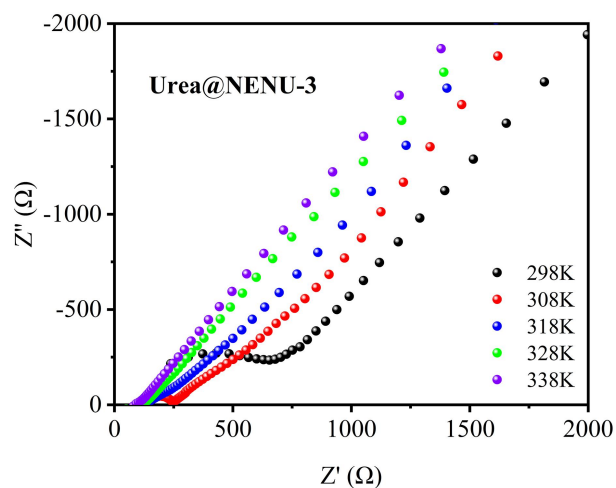

**Fig. S17** Nyquist plots of Urea@NENU-3 at different temperatures and 95% RH.

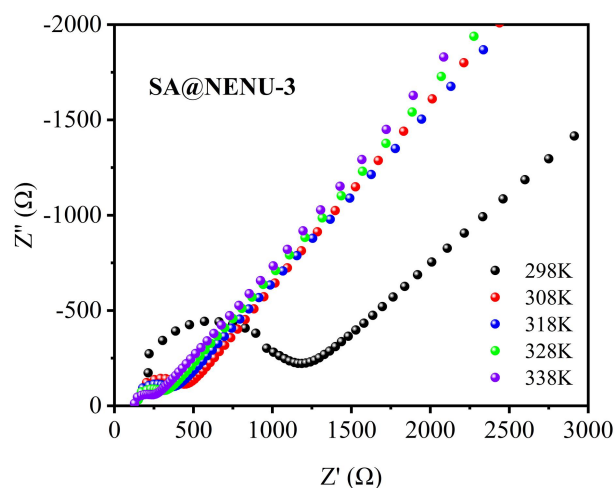

**Fig. S18** Nyquist plots of SA@NENU-3 at different temperatures and 95% RH.

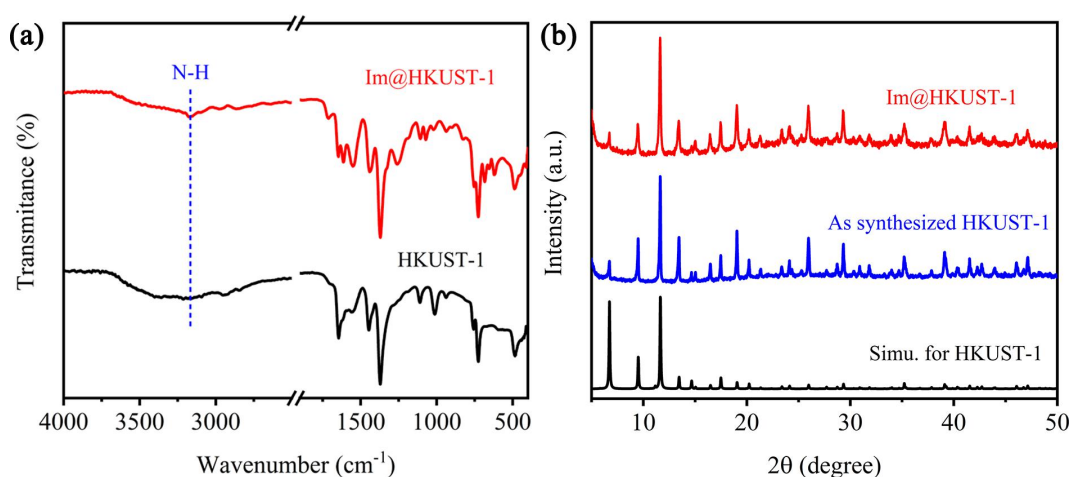

**Fig. S19** FT-IR spectra and PXRD pattern of Im@HKUST-1.

The N-H stretching vibration peak is observed in the FT-IR spectrum of Im@HKUST-1 (Fig. S19a), suggesting that Im was successfully encapsulated into the pores of HKUST-1. The PXRD

pattern of Im@HKUST-1 matches well with that of simulated HKUST-1 (Fig. S19b), revealing that it has the same framework structure with HKUST-1. And, no diffraction peaks of Im are observed, suggesting that Im was encapsulated into the pores of HKUST-1 and during the synthetic process no aggregated Im particles were formed.

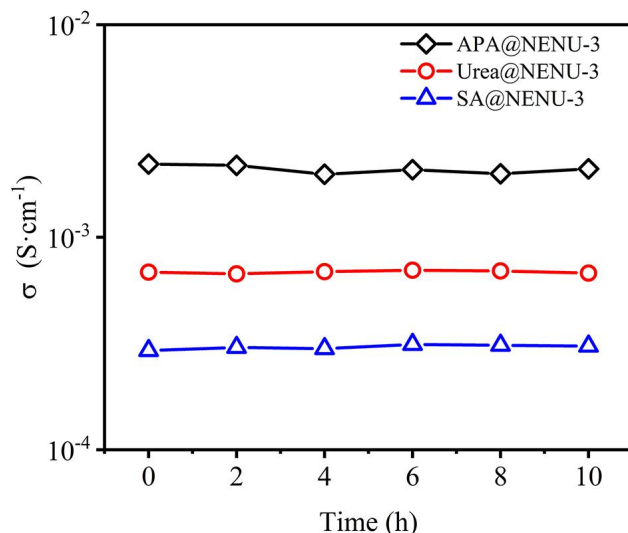

**Fig. S20** Time-dependent proton conductivity of APA@NENU-3, Urea@NENU-3 and SA@NENU-3 at 338K and 95%RH

The proton conductivity of APA@NENU-3, Urea@NENU-3 and SA@NENU-3 can maintain at least 10 h, so Im@NENU-3 possesses excellent proton-conducting durability.

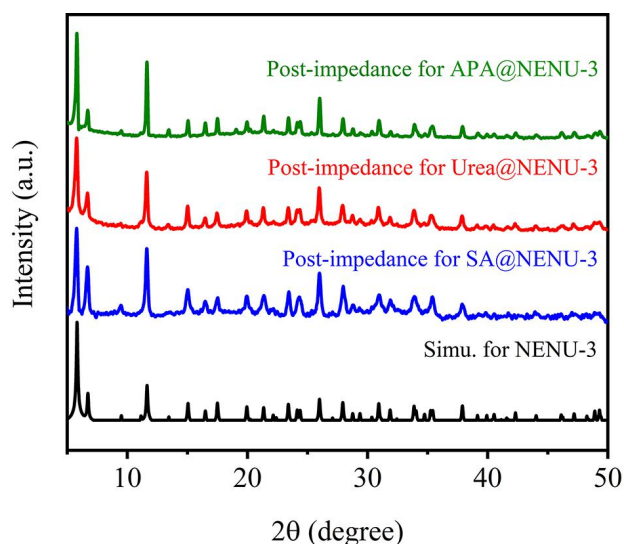

**Fig. S21** PXRD patterns of post-impedance for APA@NENU-3, Urea@NENU-3 and SA@NENU-3.

The PXRD patterns of post-impedance for APA@NENU-3, Urea@NENU-3 and SA@NENU-3 are nearly identical to NENU-3, manifesting that they still maintain structural integrity and crystallinity after AC impedance measurement, so they all have excellent structural stability.

## Section S3 Additional Tables

**Table S1** Comparison of proton conductivity of Im@NENU-3 with some other representative proton conductors measured under hydrous condition.

| Compounds                                                                                                                                                    | Conductivity (S cm <sup>-1</sup> ) with measure conditions                | References       |
|--------------------------------------------------------------------------------------------------------------------------------------------------------------|---------------------------------------------------------------------------|------------------|
| Fe-CAT-5                                                                                                                                                     | $5.0 \times 10^{-2}$ S cm <sup>-1</sup> (298K, 98%RH)                     | 1                |
| H <sup>+</sup> @Ni <sub>2</sub> (dobdc) pH=1.8                                                                                                               | $2.2 \times 10^{-2}$ S cm <sup>-1</sup> (353K, 95%RH)                     | 2                |
| PCMOF2½                                                                                                                                                      | $2.1 \times 10^{-2}$ S cm <sup>-1</sup> (358K, 90%RH)                     | 3                |
| <b>Im@NENU-3</b>                                                                                                                                             | <b><math>7.06 \times 10^{-3}</math> S cm<sup>-1</sup> (338K, 95 % RH)</b> | <b>This work</b> |
| TEPA@ZIF-8-H <sub>2</sub> CO <sub>3</sub>                                                                                                                    | $5.38 \times 10^{-3}$ S cm <sup>-1</sup> (333 K, 99% RH)                  | 4                |
| [Zn(L)Cl] <sub>n</sub>                                                                                                                                       | $4.72 \times 10^{-3}$ S cm <sup>-1</sup> (373K, 98 % RH)                  | 5                |
| PCMOF21-AcO                                                                                                                                                  | $3.08 \times 10^{-3}$ S cm <sup>-1</sup> (358K, 95 % RH)                  | 6                |
| [Cu(p-IPhHIDC)] <sub>n</sub>                                                                                                                                 | $1.51 \times 10^{-3}$ S cm <sup>-1</sup> (373K, 98 % RH)                  | 7                |
| [Zn(p-IPhHIDC)] <sub>n</sub>                                                                                                                                 | $1.9 \times 10^{-3}$ S cm <sup>-1</sup> (373K, 98 % RH)                   | 8                |
| [Co(p-IPhHIDC)] <sub>n</sub>                                                                                                                                 | $1.07 \times 10^{-3}$ S cm <sup>-1</sup> (373K, 98 % RH)                  | 8                |
| {[Gd(L)(O <sub>x</sub> )(H <sub>2</sub> O)] <sub>n</sub> · 3H <sub>2</sub> O}                                                                                | $4.7 \times 10^{-4}$ S cm <sup>-1</sup> (353K, 95 % RH)                   | 9                |
| Im@Eu-MOF                                                                                                                                                    | $4.53 \times 10^{-4}$ S cm <sup>-1</sup> (348K, 98 % RH)                  | 10               |
| {[Dy(L)(O <sub>x</sub> )(H <sub>2</sub> O)] <sub>n</sub> · 1.5H <sub>2</sub> O}                                                                              | $9.06 \times 10^{-5}$ S cm <sup>-1</sup> (353K, 95 % RH)                  | 9                |
| {[Mn(o-CPhH <sub>2</sub> IDC)(4.4'-bipy) <sub>0.5</sub> (H <sub>2</sub> O) <sub>2</sub> ] · 3H <sub>2</sub> O} <sub>n</sub>                                  | $5.74 \times 10^{-5}$ S cm <sup>-1</sup> (373K, 98 % RH)                  | 11               |
| {[Zn <sub>5</sub> (o-CPhH <sub>2</sub> IDC) <sub>2</sub> (o-CPhH <sub>2</sub> IDC) <sub>2</sub> (2.2'-bipy) <sub>5</sub> ] · 5H <sub>2</sub> O} <sub>n</sub> | $5.00 \times 10^{-5}$ S cm <sup>-1</sup> (373K, 98 % RH)                  | 11               |
| [Cu <sub>12</sub> (MES) <sub>6</sub> (H <sub>2</sub> O) <sub>3</sub> ] <sub>n</sub>                                                                          | $3.63 \times 10^{-5}$ S cm <sup>-1</sup> (333 K, 98% RH)                  | 12               |
| {[Cu <sub>12</sub> (MPS) <sub>6</sub> (H <sub>2</sub> O) <sub>4</sub> ] · 6H <sub>2</sub> O} <sub>n</sub>                                                    | $2.75 \times 10^{-5}$ S cm <sup>-1</sup> (333 K, 98% RH)                  | 12               |

## References

- 1 N. T. Nguyen, H. Furukawa, F. Gandara, C. A. Trickett, H. M. Jeong, K. E. Cordova and O. M. Yaghi, *J. Am. Chem. Soc.*, 2015, **137**, 15394.
- 2 W. J. Phang, W. R. Lee, K. Yoo, D. W. Ryu, B. Kim and C. S. Hong, *Angew. Chem.*, 2014, **53**, 8383.
- 3 S. Kim, K. W. Dawson, B. S. Gelfand, J. M. Taylor and G. K. Shimizu, *J. Am. Chem. Soc.*, 2013, **135**, 963.
- 4 Q. Ren, J. W. Yu, H. B. Luo, J. Zhang, L. Wang and X. M. Ren, *Inorg. Chem.*, 2019, **58**, 14693.
- 5 Z. Q. Shi, N. N. Ji, M. H. Wang and G. Li, *Inorg. Chem.*, 2020, **59**, 4781.
- 6 D. A. Levenson, J. Zhang, B. S. Gelfand, S. P. Kammampata, V. Thangadurai and G. K. H. Shimizu, *Dalton Trans.*, 2020, **49**, 4022.
- 7 Z. Sun, S. Yu, L. Zhao, J. Wang, Z. Li and G. Li, *Chem. Eur. J.*, 2018, **24**, 10829.
- 8 Y. Qin, M.-H. Xue, B.-H. Dou, Z.-B. Sun and G. Li, *New J. Chem.*, 2020, **44**, 2741.
- 9 S. Biswas, J. Chakraborty, V. Singh Parmar, S. P. Bera, N. Ganguli and S. Konar, *Inorg. Chem.*, 2017, **56**, 4956.
- 10 S. F. Zhou, B. B. Hao, T. Lin, C. X. Zhang and Q. L. Wang, *Dalton Trans.*, 2020, **49**, 14490.
- 11 Y. Qin, Y. Li, K. Guo, H. Tang, L. Hou and G. Li, *New J. Chem.*, 2019, **43**, 4859.
- 12 J. M. Li, T. Y. Xu, Y. L. Zhao, X. L. Hu and K. H. He, *Dalton Trans.*, 2021, **50**, 7484.
